# Supplementary material
Source: PubMed Central journal article supplement (PMC2749768)
Supplement: mmc1.pdf [file mmc1.pdf]

**Supporting Material**

**Single-molecule spectroscopy reveals that individual low-light LH2 complexes from *Rhodospseudomonas palustris* 2.1.6. have a heterogeneous polypeptide composition**

Tatas H.P. Brotosudarmo, Ralf Kunz, Paul Boehm, Alastair T. Gardiner, Vladimira Moulisova, Richard J. Cogdell, and Juergen Koehler

## Supplementary Material

|                                         | LH2*                               | LH3§                               | Mixed LH2-LH3†                     |
|-----------------------------------------|------------------------------------|------------------------------------|------------------------------------|
| $R_\alpha$ (Å)                          | 26.09                              | 26.02                              | 26.02                              |
| $R_\beta$ (Å)                           | 26.92                              | 26.95                              | 26.92                              |
| $A_\alpha$ (rad)                        | -0.2043                            | -0.2015                            | -0.2015                            |
| $A_\beta$ (rad)                         | 0.1566                             | 0.1592                             | 0.1566                             |
| $\Pi_\alpha$ (rad)                      | -3.4957                            | -3.4598                            | -3.4598                            |
| $\Pi_\beta$ (rad)                       | -0.5058                            | -0.5620                            | -0.5058                            |
| $\Phi_\alpha$ (rad)                     | -0.1361                            | -0.0801                            | -0.0801                            |
| $\Phi_\beta$ (rad)                      | -0.1284                            | -0.1288                            | -0.1284                            |
| dH (Å)                                  | 0.00725                            | -0.0785                            | 0.00725                            |
| $V_{n,i}; V_{n,e}$ (cm <sup>-1</sup> )  | 254 <sup>a</sup> ;226 <sup>a</sup> | 256 <sup>b</sup> ;210 <sup>b</sup> | 270 <sup>c</sup> ;230 <sup>c</sup> |
| $W_\alpha; W_\beta$ (cm <sup>-1</sup> ) | -35 <sup>a</sup> ;-26 <sup>a</sup> | -38 <sup>b</sup> ;22 <sup>b</sup>  | -38 <sup>c</sup> ;-25 <sup>c</sup> |

Note:  $R_\alpha$  and  $R_\beta$ , radius of  $\alpha$ - and  $\beta$ -bound Bchl *a* circle in xy-plane;  $A_\alpha$  and  $A_\beta$ , geometrical angle of the pigment of  $\alpha$ - and  $\beta$ - bound Bchl *a* in xy-plane;  $\Pi_\alpha$  and  $\Pi_\beta$ , in-plane dipole tilt from circular tangent of the  $\alpha$ - and  $\beta$ - bound Bchl *a* in xy-plane;  $\Phi_\alpha$  and  $\Phi_\beta$ , out-of-plane dipole tilt of the  $\alpha$ - and  $\beta$ - bound Bchl *a* in z-plane; dH, height differences between centres  $\alpha$ - and  $\beta$ - unit in z-plane.  $V_{n,i}$  and  $V_{n,e}$ , the nearest-neighbour intra- and inter-dimer interaction;  $W_\alpha; W_\beta$ , the  $\alpha$ -next-nearest-neighbour interaction and the  $\beta$ -next-nearest-neighbour interaction

\* McDermott, S.M., et al., 1995, *Nature* 375, 517-521 and Papiz, M.Z., et al., 2003, *J Mol Biol* 326, 1523-1538. § McLuskey, K., et al., 2001, *Biochemistry* 40(30), 8783-8789.

<sup>a</sup>Hofmann, C., et al., 2004, *Chem Phys Lett* 395, 373-378. <sup>b</sup>de Ruijter, W.P.F., et al., 2007, *Chem Phys* 341, 320-325.

†<sup>c</sup> This work

**Table S1.** The coordinate of the arrangement of Bchl *a* molecules in an LH2 complex according to the x-ray structural data.

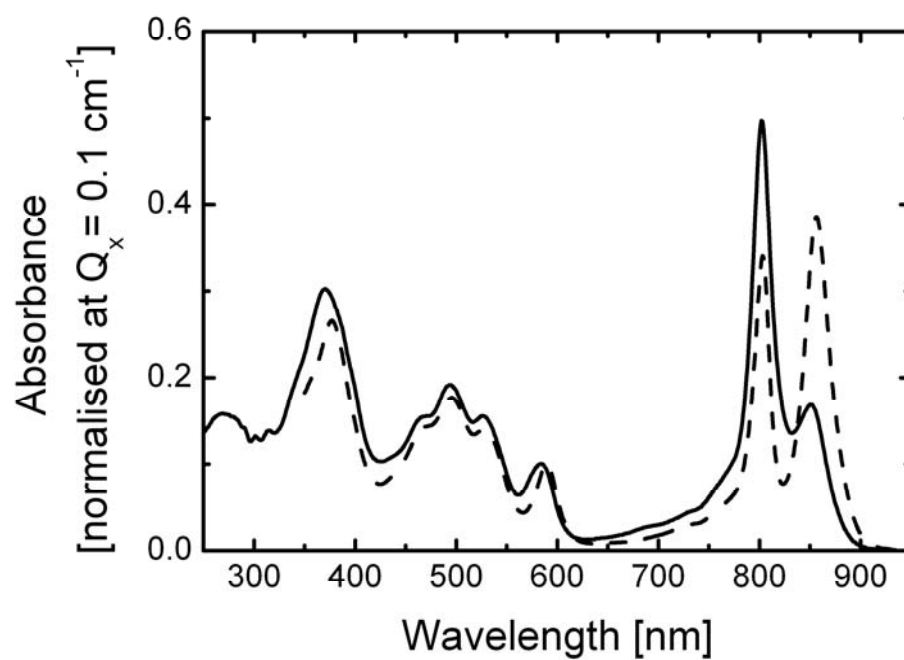

**Figure S1.** Room-temperature absorption spectra of *Rps. palustris* 2.1.6 grown at high-light (dashed line) and at low-light intensity (solid line). The absorption spectra are normalised at the  $Q_x$ -band around 590 nm.

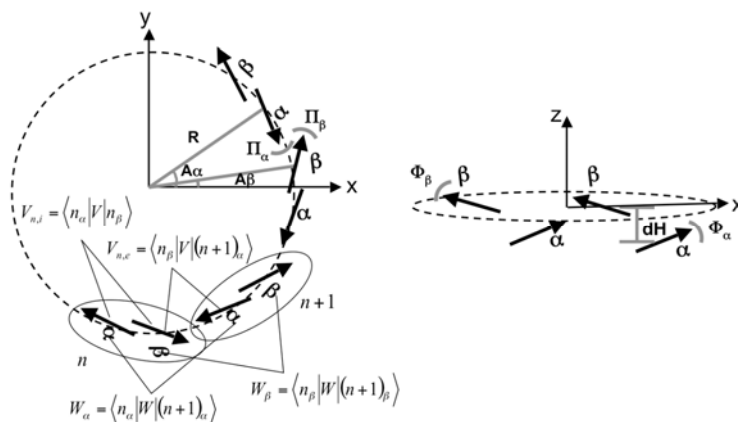

**Figure S2.** A schematic representation of the transition-dipole moments and the coordinate arrangement of the  $\alpha$ - and  $\beta$ -bound Bchl *a* molecules in the  $xy$ -plane (left) and  $zy$ -plane (right). The  $|n_\alpha\rangle$  etc. correspond to the wavefunctions of the electronically excited state localised on the  $\alpha$ -bound Bchl *a* molecule in dimer  $n$ , respectively. The strongest contributions to the interaction result from the matrix elements for the intradimer nearest-neighbour interaction  $V_{n,i}$ , the interdimer nearest neighbour interaction  $V_{n,e}$ , the  $\alpha$ -next-nearest-neighbour interaction  $W_\alpha$ , and the  $\beta$ -next-nearest-neighbour interaction  $W_\beta$ , respectively. The geometrical arrangement of the  $\alpha$ - and  $\beta$ -bound Bchl *a* molecules are defined by the radius of  $\alpha$ - and  $\beta$ -unit circle in  $xy$ -plane  $R_u$  ( $u = \alpha, \beta$ ), the geometrical angle of the pigment of  $\alpha$ - and  $\beta$ -unit in  $xy$ -plane  $A_u$ , the in-plane tilt of the transition-dipole moment of the  $\alpha$ - and  $\beta$ -Bchl *a* from the circular tangent in  $xy$ -plane  $\Pi_u$ , the height differences between the centres of the  $\alpha$ - and  $\beta$ -Bchl *a* in the  $z$ -plane  $dH_u$ , and the out-of-plane tilt of the transition-dipole moment of the  $\alpha$ - and  $\beta$ -Bchl *a* in the  $z$ -plane  $\Phi$ . The actual values of these parameters are summarised in table 1 together with the respective data for LH2 and LH3 from *Rhodospseudomonas acidophila*. The circles with the dashed line help to orient our eyes.
